# Supplementary material for: Subtracting the sequence bias from partially digested MNase-seq data reveals a general contribution of TFIIS to nucleosome positioning
Source: PubMed Central journal article supplement (PMC5719526; doi:10.1186/s13072-017-0165-x), 2017-12-07
Supplement: 13072_2017_165_MOESM7_ESM.pdf [file 13072_2017_165_MOESM7_ESM.pdf]

# Additional file 7

A

— TATA genes      — TATA-like genes

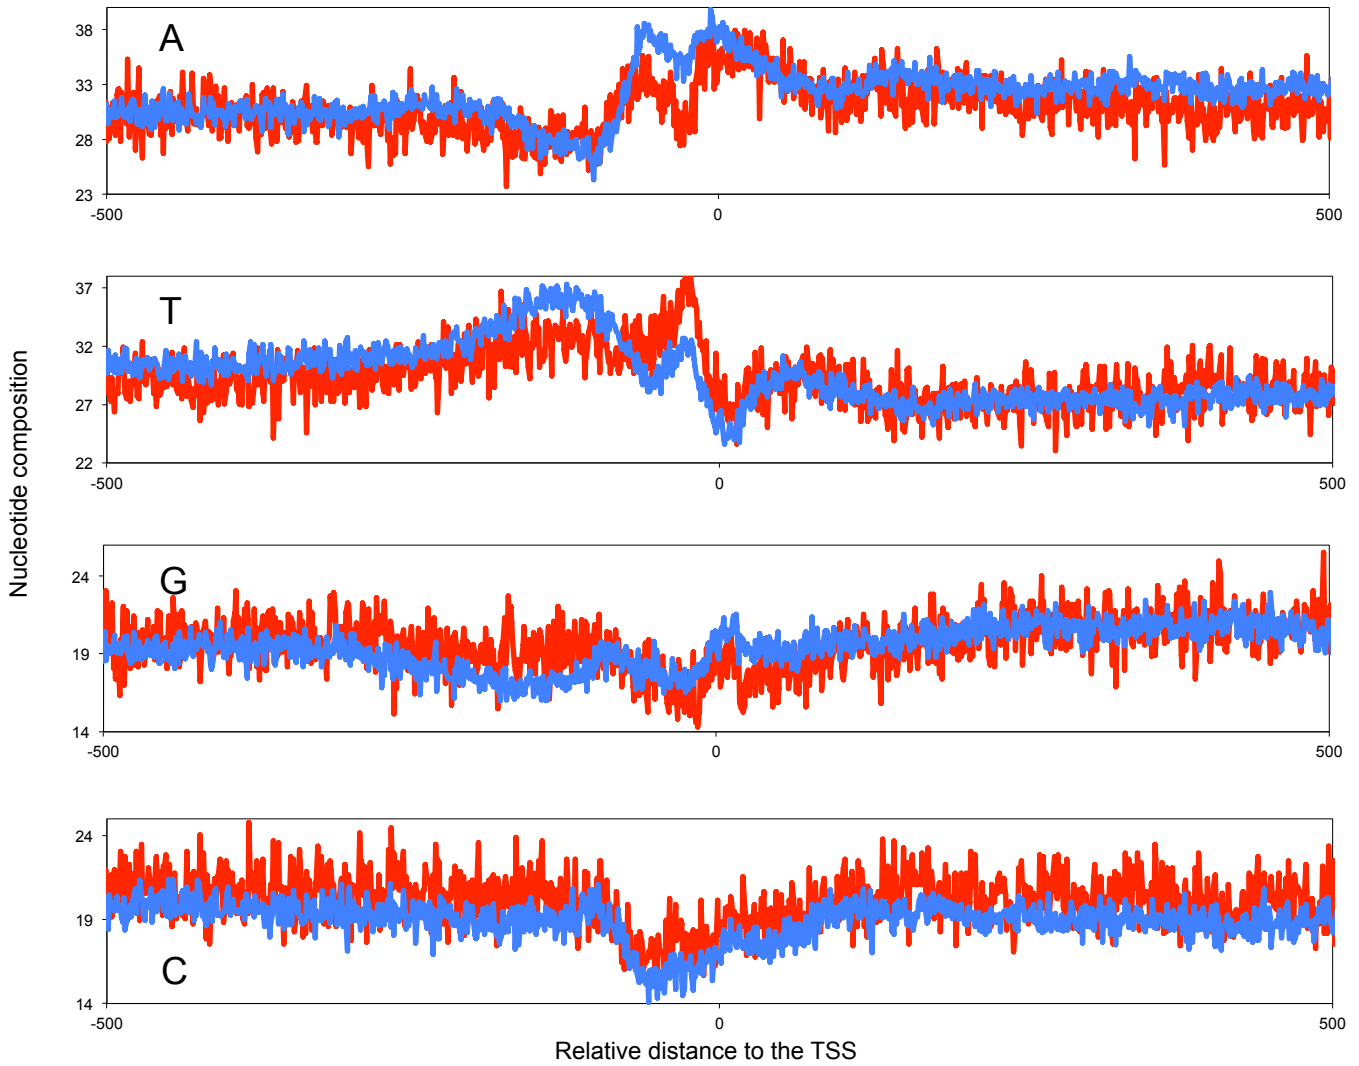

B

**Promoter**

|   | TATA  | TATA-like | p<0.001 |
|---|-------|-----------|---------|
| A | 0.295 | 0.301     | S       |
| C | 0.206 | 0.194     | S       |
| G | 0.197 | 0.186     | S       |
| T | 0.302 | 0.320     | S       |

**Gene body**

|   | TATA  | TATA-like | p<0.001 |
|---|-------|-----------|---------|
| A | 0.316 | 0.329     | S       |
| C | 0.202 | 0.190     | S       |
| G | 0.203 | 0.204     | N       |
| T | 0.279 | 0.276     | S       |
