# Supplementary material for: Subtracting the sequence bias from partially digested MNase-seq data reveals a general contribution of TFIIS to nucleosome positioning
Source: PubMed Central journal article supplement (PMC5719526; doi:10.1186/s13072-017-0165-x), 2017-12-07

# Additional file 11

A

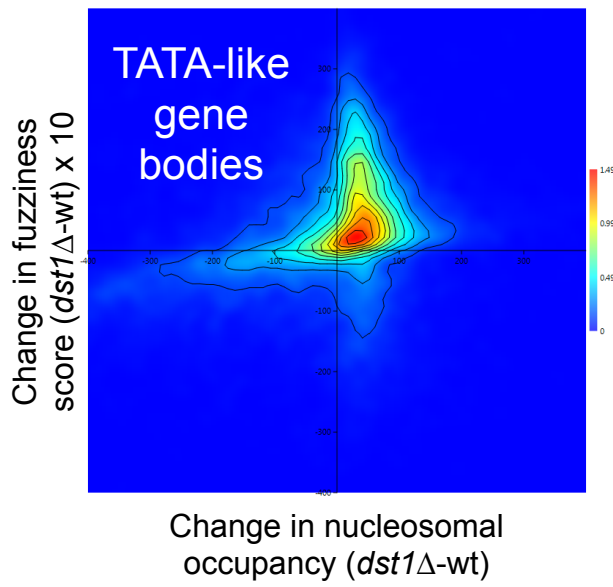

B

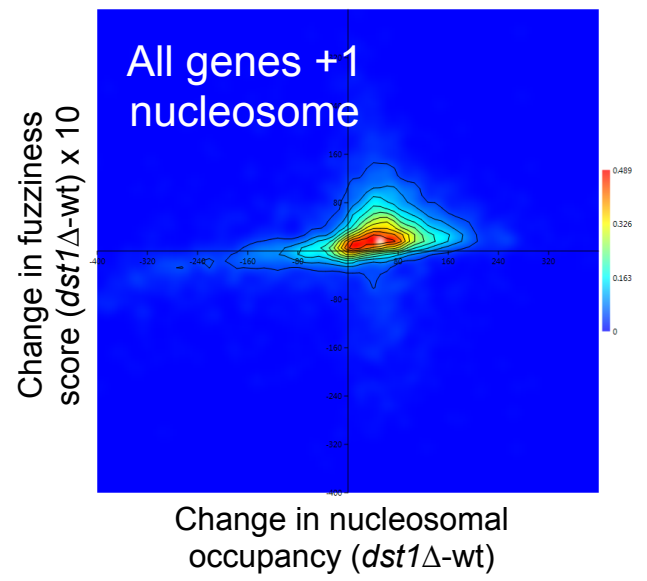

Supplement: 13072_2017_165_MOESM11_ESM.pdf [file 13072_2017_165_MOESM11_ESM.pdf]
